# Supplementary material for: Setmelanotide, a Novel, Selective Melanocortin Receptor-4 Agonist Exerts Anti-inflammatory Actions in Astrocytes and Promotes an Anti-inflammatory Macrophage Phenotype
Source: PubMed Central journal article supplement (PMC6788433; doi:10.3389/fimmu.2019.02312), 2019-10-04
Supplement: Presentation_1.pdf [file Presentation_1.pdf]

## Supplementary material (total: 4 figures)

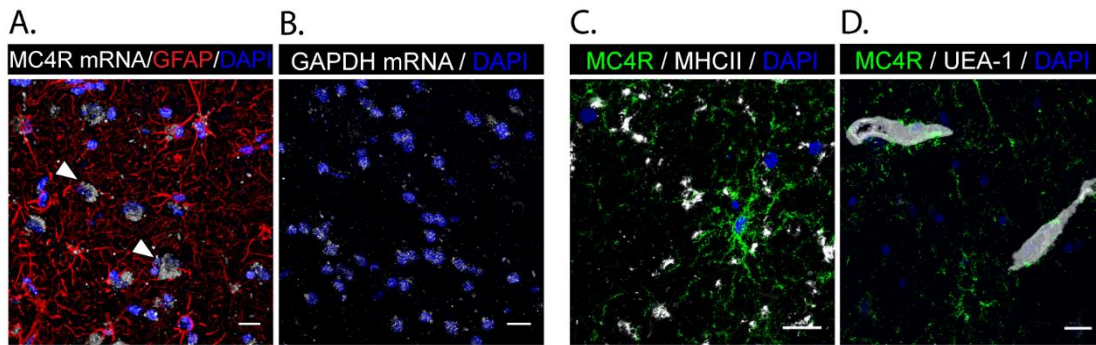

**Supplementary figure 1.** MC4R mRNA (white) is expressed on GFAP positive astrocytes (red) and on neurons (white arrows)(**A**). Positive control (GAPDH, white) for *in situ* HCR in human brain sections (**B**). Double immunofluorescence labelling shows no co-localization of MC4R protein (green) with MHCII positive cells (white, **C**) nor endothelial cells (UEA-1, white, **D**). Nuclei are stained blue. Pictures are taken in white matter control tissue. Scale-bar = 25  $\mu$ m.

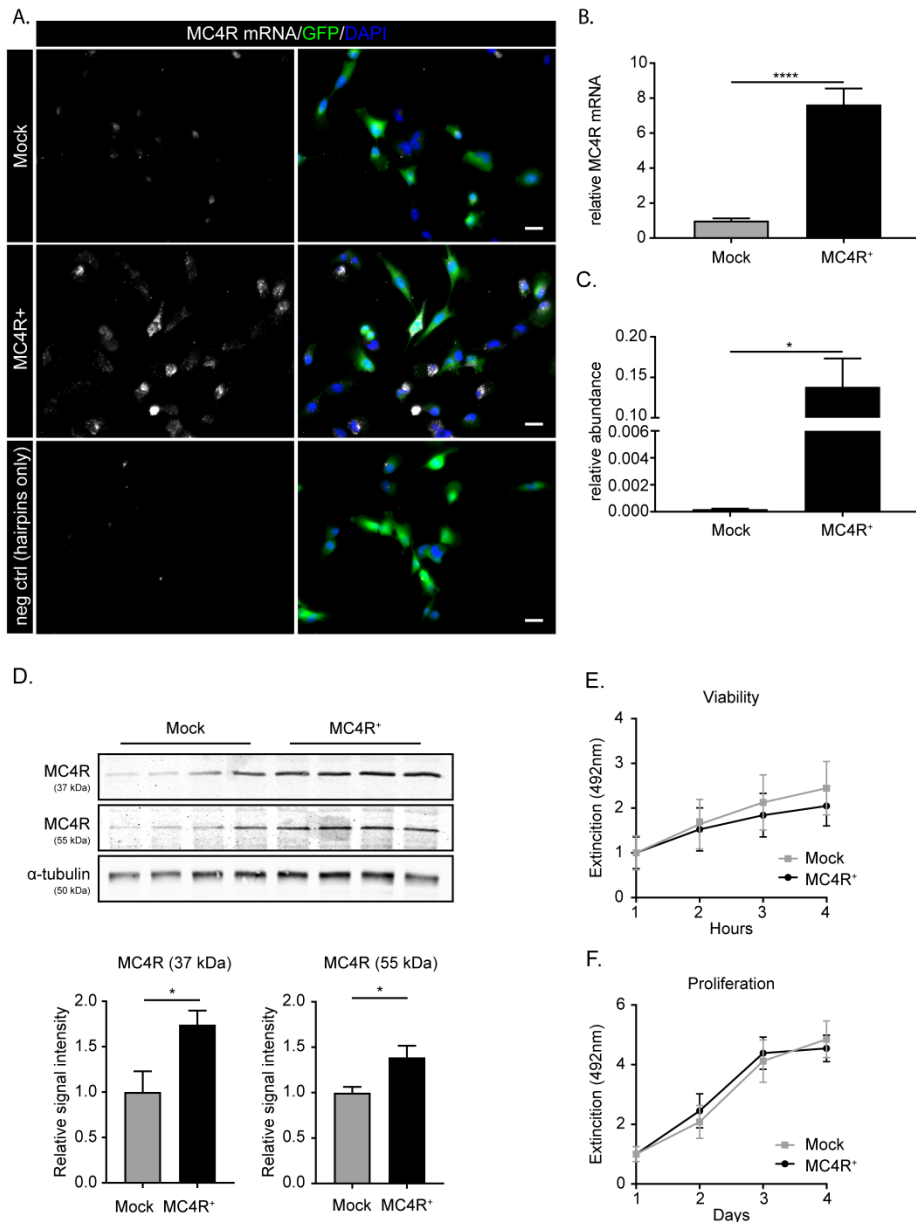

**Supplementary figure 2.** (A) representative pictures of MC4R mRNA in mock and MC4R+ u373 cells after *in situ* HCR. Negative controls, cells that were incubated only with hairpins, showed no signal. Scale-bar = 25  $\mu$ m. (B) quantification of MC4R mRNA HCR corrected for DAPI signal. At least 60 cells were quantified per group. (C) Expression of MC4R relative to GAPDH with qPCR in mock and MC4R+ U373 cells shows increased expression of MC4R in MC4R+ U373 astrocytes (3 biological replicates with n = 3 per group). (D) MC4R protein expression in mock and MC4R+ cells. Quantification showed that MC4R expression is significantly increased in MC4R+ U373 cells compared to mock U373 cells. As described in the datasheet, the anti-MC4R antibody detects the unglycosylated protein at 37kDa and a glycosylated protein at 55kDa. 2 biological replicates with n = 4 per group. (E) Manipulation of MC4R expression does not affect cell viability and proliferation of U373 astrocytoma cells (n = 3). Viability was assessed over 4 hrs. (F) proliferation was assessed over 4 days. Data represent normalized mean extinction at 492nm. Data were analyzed using students' t-test. \* $p < 0.05$ , \*\*\*\* $p < 0.0001$ .

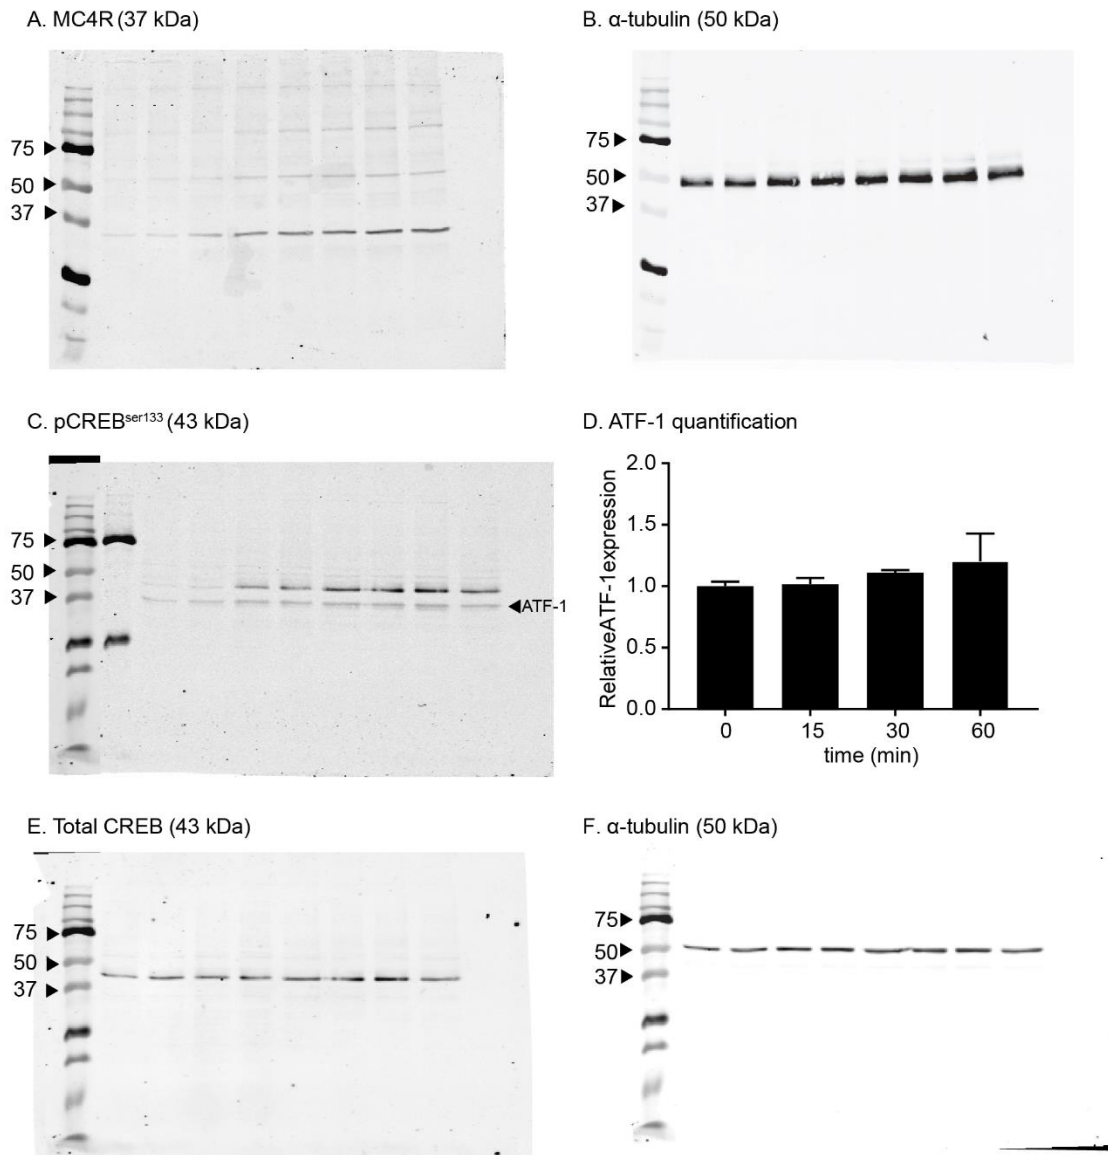

**Supplementary figure 3.** Representative blots for MC4R (A) and  $\alpha$ -tubulin (B). Blot for pCREB blot shown in (C), an extra band was observed, antibody also detects the phosphorylated form of the CREB-related protein, Cyclic AMP-dependent transcription factor (ATF-1), quantified in (D) using one-way ANOVA. Blots for total CREB (E) and  $\alpha$ -tubulin (F). All antibodies showed bands at their expected size.

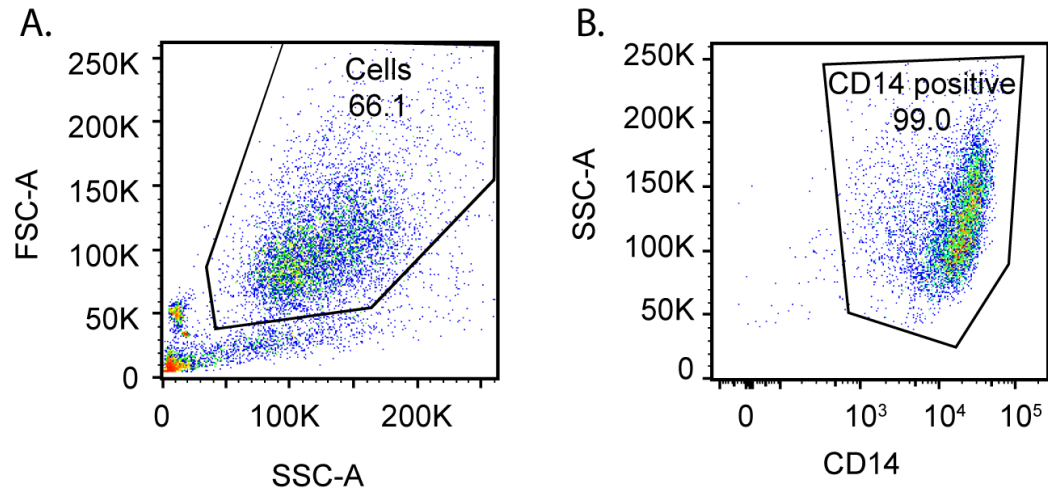

**Supplementary figure 4.** Gating strategy for FACS analysis in human macrophages. Forward (FSC) and side scatter (SSC) density plots were used to exclude debris (**A**), then cells were gated on CD14 positive (macrophages) cells (**B**).
